# Supplementary material for: Inconsistent Findings of Cardiac Troponin T and I in Clinical Routine Diagnostics: Factors of Influence
Source: J Clin Med. 2021 Jul 16;10(14):3148. doi: 10.3390/jcm10143148 (PMC8305654; doi:10.3390/jcm10143148)
Supplement: Supplementary file 1 [file jcm-10-03148-s001.zip › jcm-1280712-supplementary.pdf]

## Supplementary Material

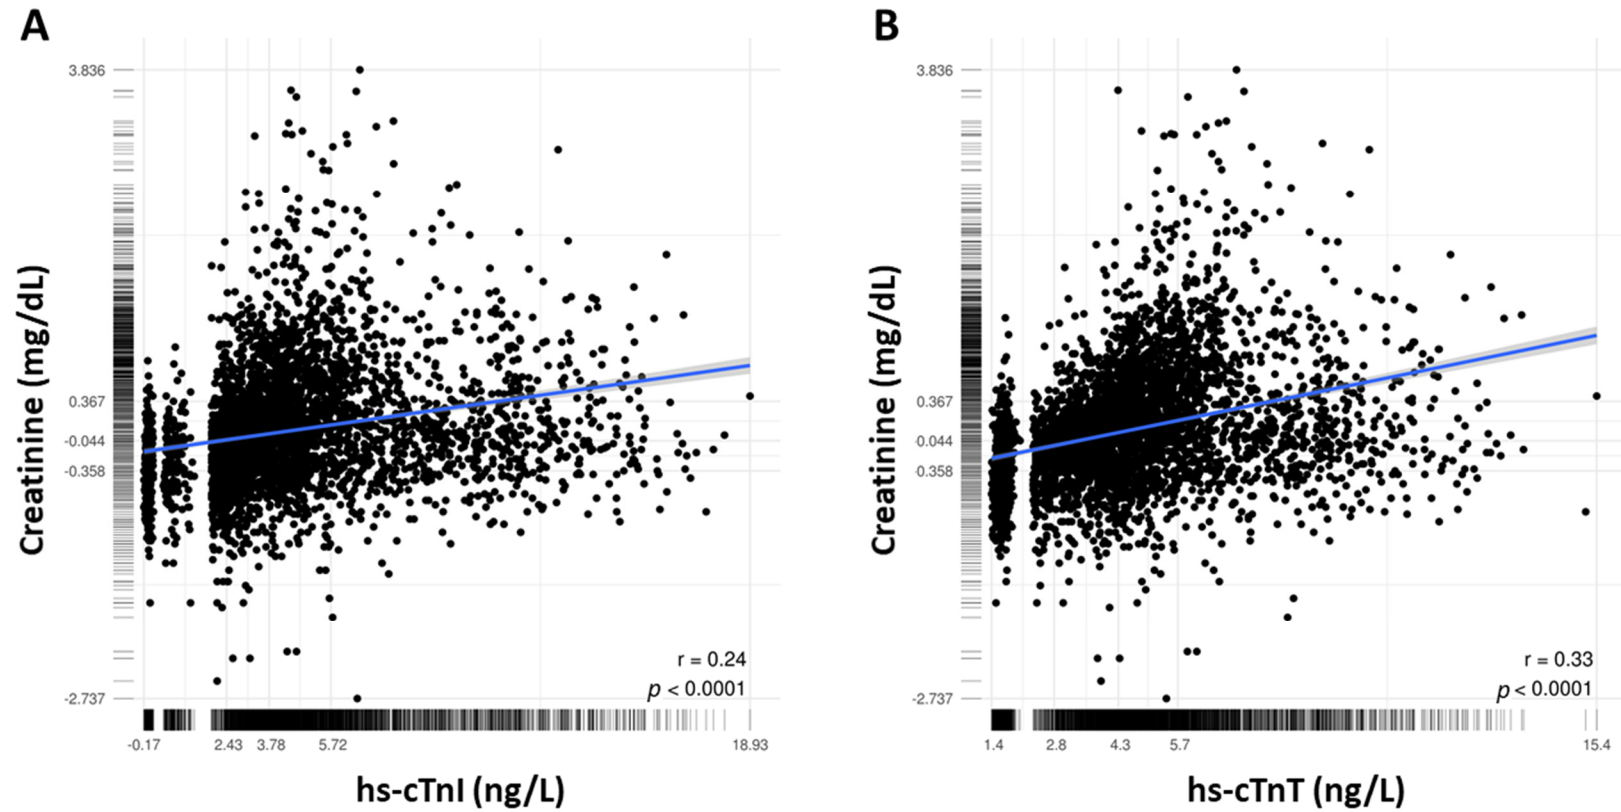

**Figure S1.** Correlation analysis between cTnT, cTnI and creatinine. Scatterplot of hs-cTnI and creatinine (A) and hs-cTnT and creatinine (B) measurements in all blood samples ( $n = 5667$ ). The blue line is the regression line. Pearson correlation coefficient is given. Axes are log scaled.

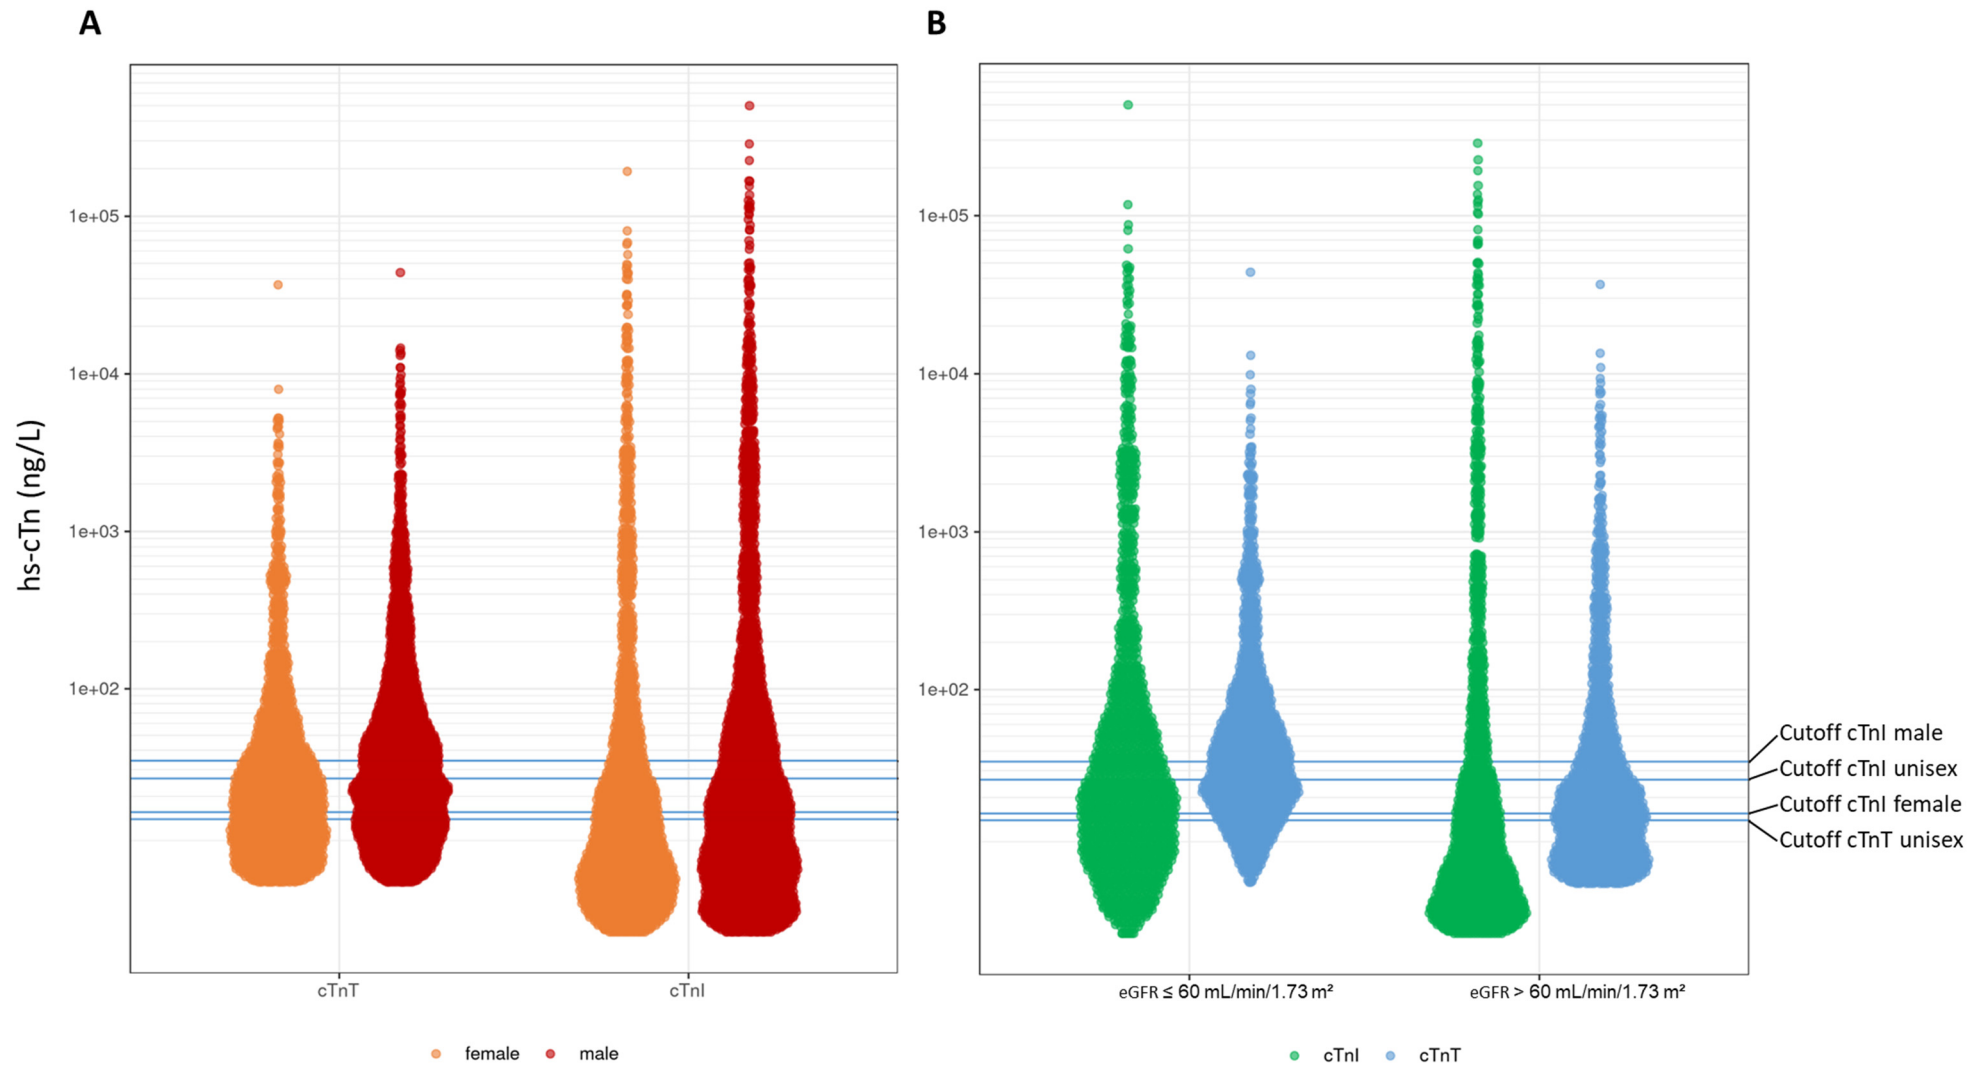

**Figure S2.** Distribution of troponin values between the two genders and for patients with an eGFR  $\leq$  60 and  $>$ 60 mL/min/1.73 m<sup>2</sup>. (A) Scatterplot of hs-cTnI and hs-cTnT concentrations for female (orange) and male (red) patients. (B) Scatterplot of hs-cTnI (green) and hs-cTnT (blue) concentrations for patients with an eGFR  $>$ 60 and  $\leq$  60 mL/min/1.73 m<sup>2</sup> in all blood samples ( $n = 5667$ ). The blue lines demonstrate the different used manufactures cutoffs.
